# Supplementary material for: Comparative optimization of combinatorial CRISPR screens
Source: PubMed Central journal article supplement (PMC9072436; doi:10.1038/s41467-022-30196-9), 2022-05-05
Supplement: 41467_2022_30196_MOESM3_ESM.pdf [file 41467_2022_30196_MOESM3_ESM.pdf]

**Title:** Supplementary Data 1:

**Description:** List of pan-essential genes

**Title:** Supplementary Data 2:

**Description:** List of non-essential genes

**Title:** Supplementary Data 3:

**Description:** List of pan-essential pairs

**Title:** Supplementary Data 4:

**Description:** List of non-essential pairs

**Title:** Supplementary Data 5:

**Description:** Cas9 sgRNA sequences and source

**Title:** Supplementary Data 6:

**Description:** Cas9 sgRNA pair combinations

**Title:** Supplementary Data 7:

**Description:** Cas12a sgRNA and PFAM annotation

**Title:** Supplementary Data 8:

**Description:** Cas12a sgRNA pair combinations

**Title:** Supplementary Data 9:

**Description:** Raw counts from CRISPR screens

**Title:** Supplementary Data 10:

**Description:** LFC from CRISPR screens

**Title:** Supplementary Data 11:

**Description:** GEMINI sensitive synergy score from CRISPR screens
